# Supplementary material for: miRNAmotif—A Tool for the Prediction of Pre-miRNA–Protein Interactions
Source: PubMed Central journal article supplement (PMC6321451; doi:10.3390/ijms19124075), 2018-12-17
Supplement: ijms-19-04075-s001.pdf [file ijms-19-04075-s001.pdf]

## SUPPLEMENTARY MATERIAL

### **miRNAmotif—A Tool for the Prediction of Pre-miRNA–Protein Interactions**

Martyna O. Urbanek-Trzeciak<sup>†,\*</sup>, Edyta Jaworska<sup>†</sup> and Włodzimierz J. Krzyzosiak

Institute of Bioorganic Chemistry, Polish Academy of Sciences, Noskowskiego 12/14, 61-704, Poznan, Poland; e.jaworska@qmul.ac.uk (E.J.); wlodkrzy@ibch.poznan.pl (W.J.K.)

\* Correspondence: martyna.urbanek@gmail.com; Tel.: +48-61-852-85-03

<sup>†</sup> These authors contributed equally to this work.

## SUPPLEMENTARY RESULTS

### 1 Human miRNAs containing Lin28 motif - results

| miRNA name     | miRNA loop sequence (motif in red) |
|----------------|------------------------------------|
| hsa-let-7a-2   | UCAAGGGAGA                         |
| hsa-mir-107    | GCAUGGAGU                          |
| hsa-mir-139    | GUGGCUCGGAG                        |
| hsa-mir-204    | CUGAGAAUAUAUGAAGGAG                |
| hsa-mir-152    | CUCUGGAG                           |
| hsa-mir-9-1    | GUGUGGAG                           |
| hsa-mir-320a   | CGGAGUCG                           |
| hsa-mir-200c   | GCGGUUGGGAGU                       |
| hsa-mir-363    | UUGAUGAGUAUCAUAGGAGAAA             |
| hsa-mir-324    | GUAAAGCUGGAGAC                     |
| hsa-mir-600    | AGGCAGUGGAGUUACU                   |
| hsa-mir-611    | CAGACGGAGAUG                       |
| hsa-mir-638    | GCGGAGGGC                          |
| hsa-mir-920    | GUAGGAGCUAAGAC                     |
| hsa-mir-1181   | CCGGAGCGGG                         |
| hsa-mir-1183   | AGGAGUUCACU                        |
| hsa-mir-1233-1 | CUAUGGGAGGGG                       |
| hsa-mir-1236   | GCAUGGAGC                          |
| hsa-mir-1202   | UGGGGGAGGCA                        |
| hsa-mir-1246   | GGAGUGGACACC                       |
| hsa-mir-1470   | GCAGGAGA                           |
| hsa-mir-1471   | AGAGGC GGAGCA                      |
| hsa-mir-320d-2 | UGGAGUCA                           |
| hsa-mir-3123   | ACAUGGAGAGU                        |
| hsa-mir-3127   | AGGAGAAGGGACGCU                    |
| hsa-mir-3134   | AUGGAGUAAAAU                       |
| hsa-mir-3185   | GGGAGCCAGGCC                       |
| hsa-mir-320e   | GGAGUCG                            |
| hsa-mir-4296   | CUGAAGUGGUUGUGGGGAGGG              |
| hsa-mir-4313   | GCUGGAGGAUGAGGAGAUGC               |
| hsa-mir-4323   | GGAGACGCC                          |
| hsa-mir-4263   | GGAGUGGCC                          |
| hsa-mir-4286   | AAGUUAGGAGAUGUU                    |

|                |                         |
|----------------|-------------------------|
| hsa-mir-4291   | GUGGAGGC                |
| hsa-mir-1233-2 | CUAUGGGAGGGG            |
| hsa-mir-3622a  | AGGGAGCU                |
| hsa-mir-3692   | UGGAGCAAUAGAUACA        |
| hsa-mir-4418   | UUGUGGGAG               |
| hsa-mir-4430   | GGAGAUCGUACC            |
| hsa-mir-4480   | ACCCAGGGAGUAAGU         |
| hsa-mir-4481   | GGAAGGGAGACC            |
| hsa-mir-4495   | AGUGGAGUUAUUUU          |
| hsa-mir-4530   | GUCAAGGAGC              |
| hsa-mir-4659a  | UUGGAGAAA               |
| hsa-mir-499b   | GUGGAGAGGA              |
| hsa-mir-4757   | CUGC GGGAGG             |
| hsa-mir-4793   | GGGAGGCCAAGAAGACC       |
| hsa-mir-5191   | CUGGGAGG                |
| hsa-mir-5195   | GGAGACCUGACC            |
| hsa-mir-5689   | CAGGAGGGUG              |
| hsa-mir-5690   | AGGAUUUGGGAGUUAUACU     |
| hsa-mir-6512   | GCUGAGGGAGAUGC          |
| hsa-mir-6769a  | GGAGCCC                 |
| hsa-mir-6778   | UGGAGGAAGCA             |
| hsa-mir-6786   | CUCAGGAG                |
| hsa-mir-6801   | GCCAGGAGC               |
| hsa-mir-6807   | GGGGAGAUGUGAAGGAAAGAACU |
| hsa-mir-6825   | CUAGGAGG                |
| hsa-mir-6846   | GGAGAGCC                |
| hsa-mir-6847   | GGAGUGGGCC              |
| hsa-mir-6850   | CGGGAGGGGAAGGGACG       |
| hsa-mir-6871   | CUGGAGG                 |
| hsa-mir-6884   | UCAAGAAAGGGAGAUAGAUGGU  |
| hsa-mir-6891   | GCAGGAGC                |
| hsa-mir-7162   | GGAGCCCCC               |
| hsa-mir-8052   | CUCAGGAG                |
| hsa-mir-8058   | GGAGAACC                |
| hsa-mir-10226  | ACUGGAGU                |
| hsa-mir-10394  | CCGGGAGG                |

---

hsa-mir-12118 GUAG**GGAG**GGUGAC

---

**Supplementary Table S1.** miRNAs predicted to be recognized by Lin28 (through GGAG motif in loop sequence) in one direction (5' → 3').

| <b>miRNA name</b> | <b>miRNA linking sequence (motif in red)</b>                           |
|-------------------|------------------------------------------------------------------------|
| hsa-let-7a-1      | UUAGGGUCACACCCACCACUG <b>GGAG</b> AUAA                                 |
| hsa-let-7a-2      | UAGAAUUACAUCAAG <b>GGAG</b> AUAA                                       |
| hsa-let-7c        | UAGAGUUACACCCUG <b>GGAG</b> UUAA                                       |
| hsa-let-7d        | UUAGGGCAGGGAUUUUGCCCACA <b>GGAG</b> GUAA                               |
| hsa-let-7e        | G <b>GGAG</b> GACACCCA <b>GGAG</b> AUCA                                |
| hsa-let-7f-1      | GUGGGGUAGUGAUUUUACCCUGUUC <b>GGAG</b> AUAA                             |
| hsa-let-7f-2      | UUAGGGUCAUACCCCAUCU <b>GGAG</b> AUAA                                   |
| hsa-let-7g        | UGAGGGUCUAUGAUACCACCCGGUAC <b>GGAG</b> AUAA                            |
| hsa-let-7i        | GGUCGGGUUGUGACAUGCCCGCUG <b>GGAG</b> AUAA                              |
| hsa-mir-10226     | U <b>GGAG</b> U                                                        |
| hsa-mir-10394     | CAUCAACAGUGGUCCCC <b>GGAG</b> GACUCCACACGCAU                           |
| hsa-mir-10525     | UG <b>GGAG</b> AAAGUACUCCCGGG                                          |
| hsa-mir-107       | UGGCAU <b>GGAG</b> UUCA                                                |
| hsa-mir-12118     | UUCUAGGGGCUGUA <b>GGAG</b> GGUGACAGUCCUGGA                             |
| hsa-mir-1233-1    | GGG <b>GGAG</b> CUGCAGGGCUAUG <b>GGAG</b> GGGCCCCAGCGUC                |
| hsa-mir-1233-2    | GGG <b>GGAG</b> CUGCAGGGCUAUG <b>GGAG</b> GGGCCCCAGCGUC                |
| hsa-mir-1236      | UGGACUGGAAGUGGGCAGCAU <b>GGAG</b> CUGACCUUCAUCAUGGCUU<br>GGCCAACAUAUUG |
| hsa-mir-1282      | CUGCUGCAUGAUCUCCGAGUCCCUGGGGGUAGAGAUGAUGGGGC<br>ACUG <b>GGAG</b>       |
| hsa-mir-132       | GUGGGAACU <b>GGAG</b> G                                                |
| hsa-mir-139       | GUGGCUC <b>GGAG</b> GC                                                 |
| hsa-mir-142       | AACAGCACU <b>GGAG</b> GG                                               |
| hsa-mir-143       | CAGUUG <b>GGAG</b> UC                                                  |
| hsa-mir-1470      | GGGC <b>GGAG</b> ACCC                                                  |
| hsa-mir-1471      | AGAGGC <b>GGAG</b> CAC                                                 |
| hsa-mir-149       | GUGCUUGUCCG <b>GGAG</b> GG                                             |
| hsa-mir-152       | CGGGCUCU <b>GGAG</b> CAG                                               |
| hsa-mir-1910      | UUGUGCUGUCCU <b>GGAG</b> G                                             |
| hsa-mir-199a-1    | A <b>GGAG</b> GCUCUCAUGUGU                                             |
| hsa-mir-200b      | U <b>GGAG</b> UCAGGUCUC                                                |
| hsa-mir-200c      | GUGCGGUUG <b>GGAG</b> UCUC                                             |

---

|                 |                                                                                                                       |
|-----------------|-----------------------------------------------------------------------------------------------------------------------|
| hsa-mir-204     | GAGAAUAUAUGAAGGAG                                                                                                     |
| hsa-mir-30e     | CUGUAAGGUGUUCAGAGGAG                                                                                                  |
| hsa-mir-3123    | AUUUCCACAUGGAGAGUGGAGCC                                                                                               |
| hsa-mir-3134    | UGGAGUAAAAUA                                                                                                          |
| hsa-mir-3154    | ACGUCAAAGGAGG                                                                                                         |
| hsa-mir-3155b   | AGGGAGCUGUCCGGCUCC                                                                                                    |
| hsa-mir-3160-2  | UGACCAGCUGAGCUGGAGG                                                                                                   |
| hsa-mir-3168    | AGCCUGAGUU <del>GGAG</del> GCUCAUCUUCACUUCUUGCUGU                                                                     |
| hsa-mir-3180-4  | GCCCCGCUCUGCUGCCGACCCUGU <del>GGAGCGGAG</del> GGUGAAGCCU                                                              |
| hsa-mir-3180-5  | GCCCCGCCUCUGCUGCCGACCCUGU <del>GGAGCGGAG</del> GGUGAAGCCU                                                             |
| hsa-mir-3202-1  | GAUU <del>GGAG</del> UCAUUUCAGAGCA                                                                                    |
| hsa-mir-320a    | <del>CGGAG</del> UCGGG                                                                                                |
| hsa-mir-320d-2  | <del>UGGAG</del> UCAGG                                                                                                |
| hsa-mir-320e    | CU <del>GGAG</del> UCGGGGA                                                                                            |
| hsa-mir-324     | UAAAGCU <del>GGAGA</del>                                                                                              |
| hsa-mir-3622a   | GCAG <del>GGAG</del> CUGAGC                                                                                           |
| hsa-mir-363     | UGAUGAGUAUCAU <del>GGAG</del> AAA                                                                                     |
| hsa-mir-3652    | UCCGAACCCAGGGGUGGGGGGU <del>GGAG</del> GCGGCUCCUGCGAUCGAA<br>GGGGACUUGAGACUCACCGGCCGCACGCCAUGAGGGCCCUGUGGG<br>UGCUGGG |
| hsa-mir-3655    | GUU <del>GGAG</del> ACUCGAUUGUUGGUGACAGCGAAAGAACGAUAAC                                                                |
| hsa-mir-3689d-1 | CUG <del>GGAG</del> GUGUGCUAUCGUCUCCCCGGG                                                                             |
| hsa-mir-3689d-2 | CUG <del>GGAG</del> GUGUGCUAUCGUCUCCCCUGGG                                                                            |
| hsa-mir-378i    | <del>UGGAG</del> UUCUGGGUGCUGUUUCCCCACUC                                                                              |
| hsa-mir-3976    | CAUAUU <del>GGAG</del> UUGGACUGCAGGGCUUCCUUUACACAAUAAAUAU<br>UGUAUGAAGUGCUGAUGUAACCUUUACUGCAGCAUG                     |
| hsa-mir-3978    | <del>GGAG</del> CCAAAAUUAGAAGGGCCAAAAUUCUACCUGGCCACUACC                                                               |
| hsa-mir-4257    | A <del>GGAG</del> CUAAGAAGCCCCUACAGGGC                                                                                |
| hsa-mir-4259    | GGCUCUGAGUGGGGAAAGUGGGGGCCUAGG <del>GGAG</del> GUCA                                                                   |
| hsa-mir-4263    | GAGAUU <del>GGAG</del> UGGCCAGUGUCCUAAACA                                                                             |
| hsa-mir-4286    | AUAGUCAUAAGUU <del>GGAG</del> AUGUUAGAGCUGU                                                                           |
| hsa-mir-4291    | GGGU <del>GGAG</del> GCAGAG                                                                                           |
| hsa-mir-4296    | GAGGGCUGAAGUGGUUGUGG <del>GGAG</del> GGGCUUCUG                                                                        |
| hsa-mir-4311    | ACCUG <del>GGAG</del> CAGCUCAG <del>GGAG</del> GGCUUCCUGGGUGAGGUGGCAGGU                                               |
| hsa-mir-4312    | CCCCAGAG <del>GGAG</del> UCA                                                                                          |
| hsa-mir-4313    | UGCAGCCCCAGCU <del>GGAG</del> GAUGA <del>GGAG</del> AUGCUGGGCUUGG                                                     |
| hsa-mir-4323    | <del>UGGAG</del> ACGCCAGG                                                                                             |

|                 |                                                                               |
|-----------------|-------------------------------------------------------------------------------|
| hsa-mir-4325    | GAGAUGCUCUAGA UCCA <b>GGAG</b> GCAGACCUCAAGGAU <b>GGAG</b> AGA<br>AGGCAGAUCC  |
| hsa-mir-4330    | GCA <b>GGAG</b> AGGAAGGGGGCUUCUUUUUGACGCCUACUUCAUCAGC<br>UGCU                 |
| hsa-mir-4418    | UGUG <b>GGAGU</b>                                                             |
| hsa-mir-4436b-1 | CAA AUGGU <b>GGAG</b> CAGAUUCGAGGGG                                           |
| hsa-mir-4436b-2 | CAA AUGGU <b>GGAG</b> CAGAUUCGAGGGG                                           |
| hsa-mir-4437    | <b>AGGAG</b> GGGAUGACCCUUG                                                    |
| hsa-mir-4441    | AG <b>GGAG</b> GAGACUGUACGUGAGAGAUAGUCAGA UCCGCAUGUUAG<br>AGCAGAGUCUCCUUCGUGU |
| hsa-mir-4453    | UCCUUCGGGGCAGGUGGGGACUGCUCCUUUG <b>GGAG</b> GA <b>GGAG</b> GA                 |
| hsa-mir-4480    | CCCAG <b>GGAG</b> UAAGU                                                       |
| hsa-mir-4481    | UUUUAAGAGGAAG <b>GGAG</b> ACCUAAGCUAG                                         |
| hsa-mir-4489    | CUGGGGACU <b>GGAG</b> AAGU                                                    |
| hsa-mir-4495    | CAGU <b>GGAG</b> UUAUUUUGAG                                                   |
| hsa-mir-4497    | GCCGCGCGCCG <b>GGAG</b> AUCCGCGCUUCCUGAAUCCCGGCCGGCCCG<br>CCCGC               |
| hsa-mir-4502    | UUUGCUGAU <b>GGAG</b> GGUCUUGCCUCAUGGGGAUG                                    |
| hsa-mir-4516    | AG <b>GGAG</b> GGCAGGGCAGGCUCUGGGGUGGGGGGUCUGUGAGUCAG<br>CCACG                |
| hsa-mir-4530    | <b>AAGGAG</b>                                                                 |
| hsa-mir-4636    | CCCAGCAAUG <b>GGAG</b> AGUGCU                                                 |
| hsa-mir-4646    | CAUUGC <b>GGAG</b> AGGGUCUCAC                                                 |
| hsa-mir-4659a   | UUU <b>GGAG</b> AAAAAU                                                        |
| hsa-mir-4667    | CAAGAAAAGCUGACU <b>GGAG</b> G                                                 |
| hsa-mir-4674    | GCGCCGCCGGGUCCCUCCUCCCG <b>GGAG</b> AGG                                       |
| hsa-mir-4687    | CUU <b>GGAG</b> CACUUGACCUU                                                   |
| hsa-mir-4690    | CCCGUGGGUGA <b>GGAGU</b>                                                      |
| hsa-mir-4708    | GAACA <b>GGAG</b> G                                                           |
| hsa-mir-4716    | GUAUACAUGUAUACAG <b>GGAG</b> G                                                |
| hsa-mir-4721    | AAGCCCCACCAGAAGGU <b>GGAG</b> GCCCAGG                                         |
| hsa-mir-4725    | CACCAG <b>GGAG</b> CUUCCAUGGGCUG                                              |
| hsa-mir-4757    | CUGCG <b>GGAG</b> GAGAC                                                       |
| hsa-mir-4776-2  | CUACUGUCCUUUCA <b>GGAG</b> AGCC                                               |
| hsa-mir-4784    | GAGUGUCAUGGUG <b>GGAG</b> CCUC                                                |
| hsa-mir-499b    | CGU <b>GGAG</b> AGGAGUUA                                                      |
| hsa-mir-5006    | <b>GGGAG</b> CCCCAUUUACAGUGGUAACUCC                                           |
| hsa-mir-5093    | UGAGCUA <b>GGAG</b> GAUU                                                      |
| hsa-mir-5191    | CCUGGUCUG <b>GGAG</b> GAUAGAAGAG                                              |

|              |                                                                                                                            |
|--------------|----------------------------------------------------------------------------------------------------------------------------|
| hsa-mir-557  | UGCUGGAGAAGU                                                                                                               |
| hsa-mir-5680 | CCUGGACACACAGGAG                                                                                                           |
| hsa-mir-5689 | UACUCAGGAGGGUGAGUA                                                                                                         |
| hsa-mir-5690 | AUUUGGAGUUAUAC                                                                                                             |
| hsa-mir-593  | CCGUUCCUCUGGGGAGCAAGGAGUGGUGCUGGGUU                                                                                        |
| hsa-mir-600  | AGUGGAGUU                                                                                                                  |
| hsa-mir-607  | AGGGAGCCAGACUGCCUGG                                                                                                        |
| hsa-mir-6076 | AGGUAGGCGAGAGUAAUAAUUAUUCUCCAAGGAGAACAUUCUGAGA<br>GGGGAAGUUGCUUUCUGCCUGGCCUU                                               |
| hsa-mir-6083 | GAAAGGAGCAGGAGCAUCGUCUUAAAGAGGGUCAGGUACCUU<br>GCU                                                                          |
| hsa-mir-611  | ACGGAGAU                                                                                                                   |
| hsa-mir-623  | UGCAUCCUAAGCUGUGCUGGAGCU                                                                                                   |
| hsa-mir-629  | UUUACGGUGAACCAGGAG                                                                                                         |
| hsa-mir-638  | AGGGCGCGGAGGGCGGACCG                                                                                                       |
| hsa-mir-646  | CACCUGUGAUCCAGGAGAGG                                                                                                       |
| hsa-mir-6505 | AUGUUGAGCCCUGUCUCUGGGGAGC                                                                                                  |
| hsa-mir-6512 | AGGCUGAGGGAGAUGCCUUC                                                                                                       |
| hsa-mir-6740 | AACUUGAGGUCUCUGGAGUUGCUUAAACCAGUUGACCGUAACC<br>UGGCCAGAGAAUUCUGAUAG                                                        |
| hsa-mir-6745 | ACUGAUUGCCCUAGUGGCUAGCCCUGGGUCUAGCAGCCUAUGGC<br>AGUGUCUGGUAACACUGGUAGGAGUCC                                                |
| hsa-mir-6753 | UCAUCUCACGUCAGAGAGAGGGGAAGGGGCUGCCCAGUGAGCCCC<br>CACAGGGCUCUACAUCUCCAGCUGGGCCUGGCUGGAGAUCCAGG<br>GUCCUGAAGGCCCCCGCCACCGUUC |
| hsa-mir-6775 | ACAAGGAGAGGGCUCACCC                                                                                                        |
| hsa-mir-6777 | GAUGGAGAGCCCUGAGCC                                                                                                         |
| hsa-mir-6778 | GUGGUUGGAGGAAGCAGCCUGAACC                                                                                                  |
| hsa-mir-6784 | ACCCCCGGAGUCUGUCACGG                                                                                                       |
| hsa-mir-6785 | GGAGAGGAGCCCCACUGUGGAAGUCUGACCCCC                                                                                          |
| hsa-mir-6789 | CGGGUCCAGGCUGGGCCCCUCGGAGGCCGGGUGCUCACUGCCCC<br>GUCC                                                                       |
| hsa-mir-6792 | UGUGAGGAGCAACAGGCACC                                                                                                       |
| hsa-mir-6801 | GAGUUAGCCAAGGAGCUUUGCAUACUC                                                                                                |
| hsa-mir-6807 | CUGUGGGCAGGGGAGAUUGUGAAGGAAAGAACUAGGACCCAUUC<br>AUC                                                                        |
| hsa-mir-6825 | GGGGCUAGGAGGCCCC                                                                                                           |
| hsa-mir-6834 | GGCGAGGAGGGACCUGUACUAGCCAUGGUUCUGAUCACA                                                                                    |
| hsa-mir-6843 | GAGGGCAGUGAGGCCUGGGGAGCUGCUGCAGGCAGCAGGUGGG<br>CGGGACGCCAGCAGGCUGUCUAGCUGUCCCAUG                                           |
| hsa-mir-6846 | AGGAGAGCCAC                                                                                                                |

|              |                                                                             |
|--------------|-----------------------------------------------------------------------------|
| hsa-mir-6847 | UGGAAGGAGUGGGCCU                                                            |
| hsa-mir-6850 | GGAGGGGAAGGGACG                                                             |
| hsa-mir-6860 | GGAGUCGGUGGGUGGAGCCAA                                                       |
| hsa-mir-6869 | UCGGAGUACCUCUGC                                                             |
| hsa-mir-6871 | UGGAGGU                                                                     |
| hsa-mir-6876 | GGAGGUGGCACUGCUGUGUG                                                        |
| hsa-mir-6884 | GCUCAAGAAAGGGAGAUAGAUGGUAG                                                  |
| hsa-mir-6891 | UCAUAUCUCUUCUCAGGGAAAGCAGGAGCCCUUCAGCAGGGUCAG<br>GGC                        |
| hsa-mir-6892 | AAAGCAGGGCUCAGGGCCAGAGACUGGGCAUAGAACUAAGGA<br>GGAUGGUGUCCUCCUGACUGCAUCUCUCU |
| hsa-mir-7154 | AGCCUUGGUAGGGAAGCAAGCUGAGGAGAU                                              |
| hsa-mir-7161 | GUUCUCACGCAAAGUGGCCAGGGUGUGGGAGAC                                           |
| hsa-mir-7162 | AACCCUGCCCUGGAGCCCCCAGCAGGGCCC                                              |
| hsa-mir-7847 | CACUGCUCAGUGGAG                                                             |
| hsa-mir-7975 | ACAGGGGAUUUAUCUCCAAGGGAGGUCCCCUG                                            |
| hsa-mir-8052 | UCAGGAG                                                                     |
| hsa-mir-8055 | AAAGAUGGAGUCGUUUGACGUCUUUUAACACC                                            |
| hsa-mir-8058 | CCCACGGAGAACCAGGGCAC                                                        |
| hsa-mir-8080 | GAGCCCUUUGAUAAGGGGGAGG                                                      |
| hsa-mir-8082 | GGGAGAGAGUCCUCUUUU                                                          |
| hsa-mir-8086 | UAGCUUUUUUUUUUUUGAGAUGGAGUCUGGC                                             |
| hsa-mir-9-1  | GUGGUGUGGAGUCUUC                                                            |
| hsa-mir-920  | GAUGUGUAAGGAGCUAAGACACACUCCA                                                |
| hsa-mir-922  | UGGACUGGGGUCAGACUGUGCCCCGAGGAGAA                                            |
| hsa-mir-936  | AAAUCACUCCAAGGAGCAACU                                                       |
| hsa-mir-9500 | AUAGGAGGGACAGCGGCCUUCCAACAGG                                                |

**Supplementary Table S2.** miRNAs predicted to be recognized by Lin28 (through GGAG motif in linking sequence) in one direction (5' → 3').

## 2 Human miRNAs containing MCPIP1 or DGCR8 motif - results

| miRNA name    | miRNA loop sequence (motif in red) |
|---------------|------------------------------------|
| hsa-let-7a-3  | GCUCUGC                            |
| hsa-mir-25    | GGACGCUGCCCU                       |
| hsa-mir-95    | GAAAUGCGUU                         |
| hsa-mir-105-1 | UGGCUGCUC AUGCA                    |
| hsa-mir-105-2 | UGGCUGC UUAUGCA                    |



|                |                       |
|----------------|-----------------------|
| hsa-mir-192    | AGUGCUCUCGUCUCCCCUCU  |
| hsa-mir-208a   | GAUGCUC               |
| hsa-mir-187    | GCUGCUCUGA            |
| hsa-mir-199a-2 | GGACAAUGCC            |
| hsa-mir-210    | UGCCCA                |
| hsa-mir-135a-1 | GAUUCUACUGCUCACUC     |
| hsa-mir-140    | GUCAUGC               |
| hsa-mir-144    | UUGCGAUGAG            |
| hsa-mir-145    | CUUAGAUGCUAAGAUGG     |
| hsa-mir-136    | GAUUCUUAUGCUC         |
| hsa-mir-1-1    | GGACCUGCU             |
| hsa-mir-155    | UGCCUCCA              |
| hsa-mir-219a-2 | UCUGCGG               |
| hsa-mir-330    | UCUGCAAGAUCAACCGA     |
| hsa-mir-337    | UGCACAGUUA            |
| hsa-mir-326    | UGGUGCUC              |
| hsa-mir-339    | GUGCCUGC              |
| hsa-mir-422a   | UCUCUGCUGC            |
| hsa-mir-450a-1 | UGCACUAUAAAUA         |
| hsa-mir-486-1  | AGGCCCUUCAUGCUGCCAGCU |
| hsa-mir-492    | UGCCACCAUUGAGAACG     |
| hsa-mir-493    | UUCAUUCGUUUGCACAUUCGG |
| hsa-mir-512-1  | UCUGGUGCCAGAAUGA      |
| hsa-mir-512-2  | UCUGGUGCCAGAAUGA      |
| hsa-mir-501    | GCUUUCUGAAUGC         |
| hsa-mir-502    | GCUGGCUCAAUGC         |
| hsa-mir-505    | UUUCUGCCAGUUUAG       |
| hsa-mir-551a   | GGGGACUGCC            |
| hsa-mir-552    | AGAUGCCU              |
| hsa-mir-551b   | UGGUGCAGAACG          |
| hsa-mir-584    | UUGCUGGG              |
| hsa-mir-589    | GGGUACUGCC            |
| hsa-mir-596    | GAACCUGCCUC           |
| hsa-mir-614    | AGCCCUGCACU           |
| hsa-mir-615    | GGUGC UUAUUG          |
| hsa-mir-618    | ACGUACAUGCAGU         |

|                 |                      |
|-----------------|----------------------|
| hsa-mir-634     | UGCCCA               |
| hsa-mir-651     | GUUCAAAUAAAAUGC      |
| hsa-mir-661     | GUUUCGGGCUGC         |
| hsa-mir-654     | GCUGAGUUCGUGC        |
| hsa-mir-550a-3  | CUUUGCUGG            |
| hsa-mir-767     | AGCAUGC UU           |
| hsa-mir-1224    | UGGUGCCG             |
| hsa-mir-1468    | UGCAUUCAACUCA        |
| hsa-mir-762     | GCCAUGC              |
| hsa-mir-670     | GAAUUUGCCUU          |
| hsa-mir-764     | GCUUGGAAAAUGC        |
| hsa-mir-300     | GCUUUACUUGC          |
| hsa-mir-708     | UGACUUGCACA          |
| hsa-mir-924     | UUGCUUAAG            |
| hsa-mir-935     | GCCAUCCUCCGUCUGC     |
| hsa-mir-937     | GCUUCGUGC            |
| hsa-mir-943     | CUGCUGG              |
| hsa-mir-1200    | UUGCCAGA             |
| hsa-mir-1302-2  | GGAUGCCC             |
| hsa-mir-1302-3  | GGAUGCCC             |
| hsa-mir-1302-4  | CAUGCAACA UUUG       |
| hsa-mir-1302-7  | GGUGCAAUAAUUG        |
| hsa-mir-1302-8  | CAUGCAGUA UUUG       |
| hsa-mir-1304    | UGAUCCUGCCA          |
| hsa-mir-1243    | GUCCAUCUCCUGC        |
| hsa-mir-1247    | GUUGCUCUCUAC         |
| hsa-mir-1250    | UUUUGCCUUUCUAA       |
| hsa-mir-1253    | GGACUGCU             |
| hsa-mir-1258    | CCUGCGAGUCCUGG       |
| hsa-mir-1279    | CUAAUGCCAAG          |
| hsa-mir-1292    | UUGCGUUGA            |
| hsa-mir-1255b-2 | UUGCGCCUCAAGAA       |
| hsa-mir-1306    | GUGCAGAGG            |
| hsa-mir-1538    | CUUCCUGCCGG          |
| hsa-mir-103b-1  | UUGAUCCAUAUGCAACAAG  |
| hsa-mir-103b-2  | UUGACCUGAAUGC UACAAG |

|                 |                      |
|-----------------|----------------------|
| hsa-mir-2116    | UCCCAUGCUAAGA        |
| hsa-mir-2681    | UGCCCAAAGACUCUUCA    |
| hsa-mir-3125    | GGUGCCU              |
| hsa-mir-3132    | GGUGCGCC             |
| hsa-mir-3136    | UGACUGCA             |
| hsa-mir-3138    | GGGUGCCCACAAGACU     |
| hsa-mir-548v    | GCCAUCAUGC           |
| hsa-mir-3157    | UGCCAACA             |
| hsa-mir-1260b   | AGGUGCU              |
| hsa-mir-3175    | UGGCCGCGUGCG         |
| hsa-mir-3179-1  | GUGCCUUACAGC         |
| hsa-mir-3179-2  | GUGCCUUACAGC         |
| hsa-mir-3179-3  | GUGCCUUACAGC         |
| hsa-mir-3181    | CGUUAGUUGCCCG        |
| hsa-mir-3194    | UGCCACCCG            |
| hsa-mir-3196    | CUCCCCAGUGCCAG       |
| hsa-mir-3201    | GCUAGGAUUGC          |
| hsa-mir-4293    | UGC UAAUUCA          |
| hsa-mir-4303    | GCUUGCUCUGC          |
| hsa-mir-4313    | GCUGGAGGAUGAGGAGAUGC |
| hsa-mir-4315-1  | GCUUUGC              |
| hsa-mir-4277    | GCUGCCCCACUGC        |
| hsa-mir-4282    | UGCCACA              |
| hsa-mir-500b    | GCUUUCUGAAUGC        |
| hsa-mir-1302-9  | GGAUGCCC             |
| hsa-mir-1302-10 | GGAUGCCC             |
| hsa-mir-1302-11 | GGAUGCCC             |
| hsa-mir-4315-2  | GCUUUGC              |
| hsa-mir-3613    | GUUGCAUUUUUAG        |
| hsa-mir-3616    | UUUGCCCAUCAG         |
| hsa-mir-3621    | GUGCGGCAGC           |
| hsa-mir-3650    | CUGACUGCGUGCCAGG     |
| hsa-mir-3667    | CUGCUGGCUGAG         |
| hsa-mir-3670-1  | CACCUGCUG            |
| hsa-mir-3686    | UCUGCACUGG           |
| hsa-mir-3691    | CUGCUGAGGG           |

|                |                                                                           |
|----------------|---------------------------------------------------------------------------|
| hsa-mir-3714   | UGC <u>U</u> CCAUCA                                                       |
| hsa-mir-3914-1 | GUA <u>U</u> GC <u>U</u> UAAC                                             |
| hsa-mir-3910-2 | G <u>U</u> GC <u>C</u> UUGAU                                              |
| hsa-mir-3942   | <u>U</u> GC <u>G</u> AAGAUAACA                                            |
| hsa-mir-3944   | CGCC <u>U</u> GC <u>G</u>                                                 |
| hsa-mir-3945   | UAUAAAA <u>U</u> GC <u>A</u> AUUA                                         |
| hsa-mir-374c   | <u>U</u> GC <u>U</u> AGGACA                                               |
| hsa-mir-1268b  | GUGGG <u>U</u> GC                                                         |
| hsa-mir-378f   | <u>C</u> U <u>G</u> C <u>U</u> AAACAACAGAACGAG                            |
| hsa-mir-4435-1 | AG <u>U</u> GC <u>A</u> CUU                                               |
| hsa-mir-4436a  | UC <u>U</u> GC <u>U</u> CCACGA                                            |
| hsa-mir-4435-2 | AG <u>U</u> GC <u>A</u> CUU                                               |
| hsa-mir-4438   | CCU <u>U</u> GC <u>C</u> UUUCCUUUGG                                       |
| hsa-mir-4460   | UCUU <u>U</u> GC <u>A</u> GUGA                                            |
| hsa-mir-4473   | GGAC <u>U</u> GC <u>U</u>                                                 |
| hsa-mir-4485   | ACA <u>U</u> GC <u>G</u> U                                                |
| hsa-mir-4489   | UGA <u>U</u> GC <u>A</u> GGACG                                            |
| hsa-mir-4493   | GAUUAUCACAGCCA <u>U</u> GC <u>C</u> UUU                                   |
| hsa-mir-4496   | <u>U</u> GC <u>C</u> UUUA                                                 |
| hsa-mir-4502   | GGGUCU <u>U</u> GC <u>C</u>                                               |
| hsa-mir-4509-1 | UUCCCUUUCUCU <u>U</u> GC <u>C</u> CUGA                                    |
| hsa-mir-4509-2 | UUCCCUUUCUCU <u>U</u> GC <u>C</u> CUGA                                    |
| hsa-mir-4509-3 | UUCCCUUUCUCU <u>U</u> GC <u>C</u> CUGA                                    |
| hsa-mir-4511   | ACUCAGUU <u>U</u> GC                                                      |
| hsa-mir-4524a  | CAC <u>U</u> GC <u>A</u> GAUUAUUUUG                                       |
| hsa-mir-4525   | GGGC <u>U</u> GC <u>C</u>                                                 |
| hsa-mir-4526   | AGGUGACG <u>U</u> GC <u>U</u>                                             |
| hsa-mir-4533   | GGC <u>U</u> GC <u>C</u>                                                  |
| hsa-mir-378i   | GUUCUGGG <u>U</u> GC                                                      |
| hsa-mir-4536-1 | UAUAUAC <u>U</u> GC <u>C</u> C <u>U</u> GC <u>U</u> UUUAUCAUACAUACAUACCUA |
| hsa-mir-3973   | <u>U</u> GC <u>U</u> CCA                                                  |
| hsa-mir-4633   | CAAA <u>U</u> GC <u>G</u> UG                                              |
| hsa-mir-4645   | UCAAGU <u>U</u> GC <u>G</u> A                                             |
| hsa-mir-4647   | GGGA <u>U</u> GC <u>A</u> GAGCC                                           |
| hsa-mir-4648   | <u>U</u> GC <u>C</u> ACCCA                                                |
| hsa-mir-4653   | GUUAAGGGUU <u>U</u> GC                                                    |

|                |                          |
|----------------|--------------------------|
| hsa-mir-1343   | CCUCUGCUCUGG             |
| hsa-mir-4731   | UGCAGUCAUCCA             |
| hsa-mir-4756   | GCCGAUUCUGC              |
| hsa-mir-4757   | CUGC GGGAGG              |
| hsa-mir-4783   | UGC GCUAACA              |
| hsa-mir-4785   | GCUGCCGC                 |
| hsa-mir-2467   | GGUCCUGC UCCU            |
| hsa-mir-4799   | CUGAGAUGCAGG             |
| hsa-mir-5001   | CUGCUGG                  |
| hsa-mir-5004   | GCACUUGC                 |
| hsa-mir-5008   | GGUGCCAUCUCC             |
| hsa-mir-5009   | UAUUUGCAUUAUACUUA        |
| hsa-mir-5010   | GCUGCCUCUUGC             |
| hsa-mir-5089   | GAAUCUGCACUC             |
| hsa-mir-5090   | GCAAAGCCUGCCCGC          |
| hsa-mir-5093   | ACAUGC CAGAGU            |
| hsa-mir-5094   | CACUGCCUUUAUG            |
| hsa-mir-5187   | GAAUGC GCUU              |
| hsa-mir-5197   | UUUUUGCCAG               |
| hsa-mir-3670-2 | CACCUGCUG                |
| hsa-mir-4524b  | CAAAAUA AUUCUGCAGUG      |
| hsa-mir-548as  | UGC UUUUA                |
| hsa-mir-5580   | UGCUGAGAAAAUUCA          |
| hsa-mir-548at  | CUGCCAAAAGAAAUGG         |
| hsa-mir-5683   | UGCACCA                  |
| hsa-mir-5695   | AGCAUGC AUU              |
| hsa-mir-5698   | AUGCAAAGU                |
| hsa-mir-5705   | AGGAUUGC U               |
| hsa-mir-5706   | GCUUCUACGUCAUUCAGCACUUGC |
| hsa-mir-5787   | GUGC UAGGUCGGC           |
| hsa-mir-6069   | GCCCAGUGC                |
| hsa-mir-6072   | GCUACUGC                 |
| hsa-mir-6085   | UCAUGCAGA                |
| hsa-mir-6088   | GUCUUGC                  |
| hsa-mir-6089-1 | UGC GCCA                 |
| hsa-mir-6504   | UCUGCACCCUGC             |

|                 |                               |
|-----------------|-------------------------------|
| hsa-mir-6511a-1 | GCAGAGGGUUGCGC                |
| hsa-mir-6512    | GCUGAGGGAGAUGC                |
| hsa-mir-6511b-1 | GCAGAGGGUUGCGC                |
| hsa-mir-6730    | GCUGCAGCUGC                   |
| hsa-mir-6731    | UGCCAACCA                     |
| hsa-mir-6736    | GUUUGCUGGCUGC                 |
| hsa-mir-6762    | CCUGCAUGG                     |
| hsa-mir-6766    | GUUCCUUCUCCUGC                |
| hsa-mir-6768    | CGGCUGCU                      |
| hsa-mir-6773    | UAUGCUA                       |
| hsa-mir-6799    | GGUCACUGACUCUGCUUCC           |
| hsa-mir-6802    | AGAUGCCU                      |
| hsa-mir-6808    | GGGGGCCUUGCU                  |
| hsa-mir-6809    | GCUCCUCCUGC                   |
| hsa-mir-6811    | GCAGUGC                       |
| hsa-mir-6814    | GCCACCCAGCCCUGC               |
| hsa-mir-6817    | UGACCUGCCCC                   |
| hsa-mir-6819    | GUGGGGUGC                     |
| hsa-mir-6821    | GCCCUGC                       |
| hsa-mir-6822    | GCUCUGC                       |
| hsa-mir-6780b   | UGCCUCCA                      |
| hsa-mir-6844    | GCUAUUUGC                     |
| hsa-mir-6845    | UGCACACCACCA                  |
| hsa-mir-6852    | AUGCUCUGACUCCCCUGAU           |
| hsa-mir-6865    | GAUGCUUC                      |
| hsa-mir-6870    | ACUUCAUUUCUCAUGC              |
| hsa-mir-6876    | GCACUGC                       |
| hsa-mir-6877    | GUGCUCAU                      |
| hsa-mir-6894    | GACAUGCUC                     |
| hsa-mir-7111    | UCUGCUAUUCGUCCACCAACCUGACUUGA |
| hsa-mir-7113    | CCUCUUGCCAUGG                 |
| hsa-mir-7114    | CCUGCCACUGG                   |
| hsa-mir-6511b-2 | GCAGAGGGUUGCGC                |
| hsa-mir-6089-2  | UGCGCCA                       |
| hsa-mir-6511a-2 | GCAGAGGGUUGCGC                |
| hsa-mir-6511a-3 | GCAGAGGGUUGCGC                |

|                 |                                |
|-----------------|--------------------------------|
| hsa-mir-6511a-4 | GCAGAGGGU <b>UGC</b> GC        |
| hsa-mir-7151    | UUGGAUUC <b>UGC</b> AAA        |
| hsa-mir-7152    | <b>UGC</b> CACA                |
| hsa-mir-7159    | GGAAGUA <b>UGC</b> CGGGCC      |
| hsa-mir-7702    | ACA <b>UGC</b> AGU             |
| hsa-mir-7847    | <b>CUGC</b> UCAG               |
| hsa-mir-7853    | UGG <b>UGC</b> A               |
| hsa-mir-8057    | CU <b>UGC</b> GG               |
| hsa-mir-8066    | GCCUC <b>UGC</b>               |
| hsa-mir-8075    | GCUUAUACG <b>UGCCCUUGC</b>     |
| hsa-mir-8078    | GAU <b>UCCUGC</b> CUU          |
| hsa-mir-8089    | GGC <b>UGC</b> CACC            |
| hsa-mir-548bb   | <b>UGC</b> CCAA                |
| hsa-mir-9718    | UCUAAAACCAGU <b>UGC</b> UGA    |
| hsa-mir-3179-4  | <b>GUGCCU</b> UACAGC           |
| hsa-mir-3670-3  | CACC <b>UGC</b> UG             |
| hsa-mir-3670-4  | CACC <b>UGC</b> UG             |
| hsa-mir-548bc   | AUUAC <b>UGC</b> UCAU          |
| hsa-mir-9986    | CUAUUACUACAGCUA <b>UGCC</b> AG |
| hsa-mir-11401   | <b>CUGC</b> UAGG               |
| hsa-mir-12113   | GUUCAU <b>UGC</b>              |
| hsa-mir-12116   | <b>UGC</b> U <b>GCC</b> UCCA   |
| hsa-mir-12130   | <b>GUGC</b> UAC                |

**Supplementary Table S3a.** miRNAs predicted to be recognized by MCP1P1 (through UGC motif in the loop sequence) in one direction (5' → 3').

| miRNA name    | miRNA loop sequence (motif in red) |
|---------------|------------------------------------|
| hsa-let-7b    | AGUGA <b>UGU</b> U                 |
| hsa-mir-19b-2 | UAUA <b>UGU</b> A                  |
| hsa-mir-20a   | AG <b>UGU</b> UUAGUUAUCU           |
| hsa-mir-92a-1 | <b>UGU</b> UUC <b>UGU</b> A        |
| hsa-mir-96    | <b>UGU</b> CUCUCCG                 |
| hsa-mir-101-1 | <b>CUGU</b> CUAUUCUAAAGG           |
| hsa-mir-29b-1 | AUUUAAAUAGUGAU <b>UGU</b>          |
| hsa-mir-29b-2 | AUUUUCCAUCUU <b>UGU</b> AU         |
| hsa-mir-198   | GGU <b>UCCUGU</b> GAUUUUUCC        |

|                |                      |
|----------------|----------------------|
| hsa-mir-30c-2  | CUGUGGAAAGUAAGAAAG   |
| hsa-mir-30d    | CUGUAAGACACAGCUAAG   |
| hsa-mir-7-3    | UGAUGUACUA           |
| hsa-mir-10a    | UGUAAGGAAUUUUGUGGUCA |
| hsa-mir-181b-1 | GUGUGGAC             |
| hsa-mir-203a   | UCUGUAGCGC           |
| hsa-mir-205    | UGUCUCAUACCCAACCA    |
| hsa-mir-222    | UGUCUUUCGUAAUCA      |
| hsa-mir-223    | UCCAUGUGGUAGA        |
| hsa-mir-23b    | UUGUGACUUAAGAUUAAA   |
| hsa-mir-30b    | UGUAAUACAUGGAUUG     |
| hsa-mir-122    | UGUGUCUAAACUAUCA     |
| hsa-mir-124-1  | UUUAAAUGUCCAUAACA    |
| hsa-mir-124-2  | UUUAAUGUCAUAACA      |
| hsa-mir-124-3  | UUUAAUGUCUAUAACA     |
| hsa-mir-130a   | GCACCUGU             |
| hsa-mir-133a-2 | GACUGUCCAAUG         |
| hsa-mir-141    | UCUAAUUGUGA          |
| hsa-mir-9-1    | GUGUGGAG             |
| hsa-mir-9-2    | UGUAUUGGUCU          |
| hsa-mir-146a   | UGUCAGUGUCA          |
| hsa-mir-149    | UUGUCCGA             |
| hsa-mir-154    | GCUUUAUUUGU          |
| hsa-mir-184    | UGUGACUGUA           |
| hsa-mir-190a   | UGUUAUUUAAUCCA       |
| hsa-mir-193a   | GAGGGUGUCGGAUC       |
| hsa-mir-194-1  | GUGUACCAAU           |
| hsa-mir-29c    | GAGUCUGUUUUUGUC      |
| hsa-mir-101-2  | CUGUAUAUCUGAAAGG     |
| hsa-mir-34b    | CUGUGGUGG            |
| hsa-mir-30e    | GGUGUUCA             |
| hsa-mir-26a-2  | CUGUUCCAUCUGUGAGG    |
| hsa-mir-365a   | UGUUCCAUAUCCA        |
| hsa-mir-302b   | CUGUGACUUUAAAAG      |
| hsa-mir-376c   | UAUGUUAUUUAUGGUUA    |
| hsa-mir-372    | AUGUCCAAG            |



|                |                     |
|----------------|---------------------|
| hsa-mir-373    | CCUUUUUGUCUGUACUGG  |
| hsa-mir-377    | GCUUUAUUUAUGU       |
| hsa-mir-380    | AUCUCUGU            |
| hsa-mir-340    | UAUGUCGUUUG         |
| hsa-mir-151a   | UGUCUCAUCCCC        |
| hsa-mir-148b   | CUGUGGCUCUCUGAAAG   |
| hsa-mir-335    | UUGUCAUAAA          |
| hsa-mir-325    | UUUGUGA             |
| hsa-mir-384    | UGUAUAAUGUUCA       |
| hsa-mir-429    | ACCUGGCCUCUGU       |
| hsa-mir-449a   | AUGUGAAU            |
| hsa-mir-452    | ACUUUGUAACUAUGU     |
| hsa-mir-412    | UGUUUCUA            |
| hsa-mir-495    | GCUUUAUAUGUGA       |
| hsa-mir-193b   | GUUUAUGUUUUAU       |
| hsa-mir-497    | GCACUGUGGC          |
| hsa-mir-515-1  | UUGUCUGAAAG         |
| hsa-mir-520f   | UGUGGUCA            |
| hsa-mir-515-2  | UUGUCUGAAAG         |
| hsa-mir-525    | CUCUUAUGUGAAAAAAAAG |
| hsa-mir-518f   | UUGUCUAAAA          |
| hsa-mir-517a   | CUGUUGUAUAAAAGAAAAG |
| hsa-mir-519d   | UGUUUCUCUUA         |
| hsa-mir-521-2  | UUGUCUAAAA          |
| hsa-mir-517b   | CUGUUGUCUAAGAAAAG   |
| hsa-mir-520g   | UUGUUGUCUGAGAAAAA   |
| hsa-mir-516b-2 | GUGUUUUGUGAAAG      |
| hsa-mir-526a-2 | CUGUUGAAAGAAAAG     |
| hsa-mir-518e   | CUGUUGGCUAAAAGAAAAG |
| hsa-mir-516b-1 | UUGUGAAAG           |
| hsa-mir-517c   | CUGUUGUCUAAGAAAAG   |
| hsa-mir-520h   | UUGUUGUCUGAGAAAAA   |
| hsa-mir-507    | GUGUCUAGAAAU        |
| hsa-mir-509-1  | AUGUAUAAUUAAAAAU    |
| hsa-mir-510    | AUGUAAUUAGGU        |
| hsa-mir-376a-2 | GUGUUUGAU           |

|                |                    |
|----------------|--------------------|
| hsa-mir-553    | UUUUGUCUGA         |
| hsa-mir-92b    | UGUUUUUCCCCGCCA    |
| hsa-mir-563    | AUGUAAU            |
| hsa-mir-571    | AGCCAUGUCU         |
| hsa-mir-573    | ACUCAUGU           |
| hsa-mir-581    | GCUUUUAGAAAAUUUGU  |
| hsa-mir-582    | ACUAAUCUAACUAAUUGU |
| hsa-mir-586    | CAAUACAUGUG        |
| hsa-mir-587    | GGGAAUGUGUC        |
| hsa-mir-588    | ACUAUCCAUGU        |
| hsa-mir-550a-1 | UUGUUGUAAGA        |
| hsa-mir-550a-2 | UUGUUGUCAGA        |
| hsa-mir-591    | UAGUGUAGAAUG       |
| hsa-mir-595    | UUGUAAG            |
| hsa-mir-602    | GUGUUCAC           |
| hsa-mir-625    | UGUAAUUAGAUCUCA    |
| hsa-mir-627    | GGUUGUUU           |
| hsa-mir-33b    | GUGUGAGGC          |
| hsa-mir-641    | UGUCCUCU           |
| hsa-mir-646    | UGUGAUCCCA         |
| hsa-mir-649    | AUCUAUGU           |
| hsa-mir-548d-1 | CCUGUAAAAGUAAUGG   |
| hsa-mir-663a   | CCUCGUGUCUGU       |
| hsa-mir-411    | GCUUUAUCUGUGA      |
| hsa-mir-549a   | UGUCUCAAUA         |
| hsa-mir-542    | ACCAGUGU           |
| hsa-mir-671    | GAUGGAUGUUU        |
| hsa-mir-668    | UAAUGUG            |
| hsa-mir-1323   | CUGUGGUUUGAAAGG    |
| hsa-mir-454    | GUGUAAAU           |
| hsa-mir-1298   | UACCCUGUGUA        |
| hsa-mir-892a   | ACUACACUACAUGU     |
| hsa-mir-509-2  | AUGUAUAAUUAAAAU    |
| hsa-mir-450b   | AUGUAAUAUAAGU      |
| hsa-mir-890    | GCUUAGAUUACAUGU    |
| hsa-mir-888    | ACUAGAUUACAUGU     |

|                |                    |
|----------------|--------------------|
| hsa-mir-875    | UGUUCUUA AAAUCA    |
| hsa-mir-876    | UCUAAGCUAAUGU      |
| hsa-mir-543    | GCUUUAUUUGUGA      |
| hsa-mir-922    | CAGACUGUG          |
| hsa-mir-509-3  | AUGUA AAUUA AAAAU  |
| hsa-mir-940    | CCGUGUGUUGAGG      |
| hsa-mir-942    | UGUACUCACAGCCCCUCA |
| hsa-mir-944    | UUAAAUUGUAUAAAAGA  |
| hsa-mir-1231   | UGUCUGUCCA         |
| hsa-mir-663b   | UCUGUGG            |
| hsa-mir-1291   | UUGUACUGUGG        |
| hsa-mir-1293   | AGCUUGUACCU        |
| hsa-mir-1294   | CAUUGUCUG          |
| hsa-mir-1295a  | GAAAUGUGGCCUG      |
| hsa-mir-1302-5 | CAUGUAAUCUUUG      |
| hsa-mir-1305   | UUGUAAAGA          |
| hsa-mir-548f-5 | UGUAAGUA           |
| hsa-mir-1244-1 | ACUUAGCUGU         |
| hsa-mir-1245a  | GAUGUUGAAUACUCUUU  |
| hsa-mir-1248   | ACCAUGU            |
| hsa-mir-1257   | CCCUGUGG           |
| hsa-mir-1265   | GGCAUGUUCA         |
| hsa-mir-1268a  | CCUGUGG            |
| hsa-mir-1275   | UGUGUCUGUA         |
| hsa-mir-1281   | GAGUGUCUCUUGUC     |
| hsa-mir-1197   | GCUUUAUUUGUGA      |
| hsa-mir-1537   | GUCCUGUCCACAC      |
| hsa-mir-1908   | AUGUGUGGU          |
| hsa-mir-1972-1 | AUGUGUCAUUUAAAAAU  |
| hsa-mir-1976   | CCUAAGGUGU         |
| hsa-mir-2052   | AUGUCCCUUAGUCAAAGU |
| hsa-mir-2053   | CUGUGAAG           |
| hsa-mir-2278   | GUGUGGAC           |
| hsa-mir-2909   | CUUCCCCUGUGG       |
| hsa-mir-3119-2 | AGAUGUUUAGCU       |
| hsa-mir-3120   | GGUGAGCGGAUGUUC    |

|                |                                                                       |
|----------------|-----------------------------------------------------------------------|
| hsa-mir-3129   | CUGU <sup>U</sup> AAUGAAU                                             |
| hsa-mir-3130-1 | CUGU <sup>U</sup> GUCAAG                                              |
| hsa-mir-466    | UGUA <sup>U</sup> AUAUGUA                                             |
| hsa-mir-3148   | UGA <sup>U</sup> GUAGCCA                                              |
| hsa-mir-3074   | GUGUG <sup>U</sup> AAAAUGAGAAC                                        |
| hsa-mir-3158-2 | UCCAAUACCU <sup>U</sup> GUAAAGCAGA                                    |
| hsa-mir-3162   | AACAA <sup>U</sup> GUUU                                               |
| hsa-mir-3163   | ACCUUCCU <sup>U</sup> CCUUGU                                          |
| hsa-mir-3166   | GAUUUC <sup>U</sup> GUUCAUCCUC                                        |
| hsa-mir-3187   | GGUCACCA <sup>U</sup> GUUCUCC                                         |
| hsa-mir-3190   | GCCCU <sup>U</sup> GU                                                 |
| hsa-mir-514b   | GUG <sup>U</sup> AAUUAGAU                                             |
| hsa-mir-4296   | CUGAAGUGGU <sup>U</sup> GU <sup>U</sup> GGGGAGGG                      |
| hsa-mir-4294   | CCA <sup>U</sup> GU <sup>U</sup> CUGUGAGGG                            |
| hsa-mir-4307   | GUU <sup>U</sup> GU <sup>U</sup> CAU                                  |
| hsa-mir-4317   | UUUAUUU <sup>U</sup> GUAG                                             |
| hsa-mir-4253   | ACUUACU <sup>U</sup> GU                                               |
| hsa-mir-4269   | GCCUCUUUCUU <sup>U</sup> GU                                           |
| hsa-mir-4283-1 | GGUG <sup>U</sup> UUUCUGUC                                            |
| hsa-mir-4286   | AAGUUAGGAGA <sup>U</sup> GUU                                          |
| hsa-mir-1244-2 | ACUUAGC <sup>U</sup> GU                                               |
| hsa-mir-1244-3 | ACUUAGC <sup>U</sup> GU                                               |
| hsa-mir-1972-2 | A <sup>U</sup> GU <sup>U</sup> GUCAUUUAAAAAU                          |
| hsa-mir-4283-2 | GGUG <sup>U</sup> UUUCUGUC                                            |
| hsa-mir-3609   | ACCU <sup>U</sup> GU                                                  |
| hsa-mir-3614   | UC <sup>U</sup> GU <sup>U</sup> CUUGG                                 |
| hsa-mir-3615   | GGUC <sup>U</sup> GU <sup>U</sup> GGUCC                               |
| hsa-mir-3617   | AUUAGAAACCAUA <sup>U</sup> GU                                         |
| hsa-mir-3649   | AG <sup>U</sup> GU <sup>U</sup> UCU                                   |
| hsa-mir-3654   | GAA <sup>U</sup> GU <sup>U</sup> C                                    |
| hsa-mir-3671   | <sup>U</sup> GUAAAUA                                                  |
| hsa-mir-3684   | <sup>U</sup> GUUGAGCAUUACUCA                                          |
| hsa-mir-3688-1 | UA <sup>U</sup> GU <sup>U</sup> A <sup>U</sup> GU <sup>U</sup> CUGUUA |
| hsa-mir-3689a  | <sup>U</sup> GU <sup>U</sup> GAUCCUGUG                                |
| hsa-mir-3690-1 | AGG <sup>U</sup> GU <sup>U</sup> UUCUACU                              |
| hsa-mir-3180-4 | ACCC <sup>U</sup> GU                                                  |

|                |                          |
|----------------|--------------------------|
| hsa-mir-3180-5 | ACCCUGU                  |
| hsa-mir-3908   | UAACGUGUA                |
| hsa-mir-3916   | GGUGAAUGUGUC             |
| hsa-mir-3919   | UAGUUUGUAGUAGUUCGUA      |
| hsa-mir-3925   | UGUCACAUCUCCA            |
| hsa-mir-3939   | GUACCGUCACAU             |
| hsa-mir-378d-1 | GUUGUUAUUAC              |
| hsa-mir-548ab  | ACUUGUAUUUAUUUGU         |
| hsa-mir-4418   | UUGUGGGAG                |
| hsa-mir-4421   | ACACUUGUUGGG             |
| hsa-mir-4422   | ACCAUGUACCAGU            |
| hsa-mir-4423   | UGUUUAAGCCUA             |
| hsa-mir-4426   | UUGUCUGACUACAAUAUUCAAA   |
| hsa-mir-4429   | GUGUCUAAU                |
| hsa-mir-4432   | UGUCAUCC                 |
| hsa-mir-4451   | ACCACUCCACAUGU           |
| hsa-mir-4463   | UCUGAAUUUGUGA            |
| hsa-mir-3155b  | CUGUCCGG                 |
| hsa-mir-4482   | GUGUGGAAGAUGGC           |
| hsa-mir-4498   | AUCUUUGU                 |
| hsa-mir-4501   | AAAUAUGUCUGAGCUU         |
| hsa-mir-4505   | ACUUUCUGU                |
| hsa-mir-4513   | CUGUCUAAAA               |
| hsa-mir-4521   | UGUAGCAUCA               |
| hsa-mir-4528   | AUAUGUAU                 |
| hsa-mir-4637   | UGUAUUUA                 |
| hsa-mir-4652   | ACUAACUAACCAGAACUAUUUUGU |
| hsa-mir-4654   | UGGAAUGUG                |
| hsa-mir-4655   | CGUGGGAAAGUGUUG          |
| hsa-mir-4663   | GCAUCUGU                 |
| hsa-mir-4669   | CAUCUGUG                 |
| hsa-mir-4679-1 | UUGUUAGAAACAAAA          |
| hsa-mir-4681   | CAUUGUG                  |
| hsa-mir-4684   | ACAUUUGUCUUGGU           |
| hsa-mir-4691   | GAUGUCUC                 |
| hsa-mir-4701   | GUGAAUGUCGGGC            |

|                 |                           |
|-----------------|---------------------------|
| hsa-mir-4703    | UGUUUGAUUUG               |
| hsa-mir-4704    | UGUCUCCUCACUCA            |
| hsa-mir-4716    | UACAUGUA                  |
| hsa-mir-4718    | ACCUGUUUGU                |
| hsa-mir-4723    | AGAGAAUGUUGAACU           |
| hsa-mir-4724    | GUGUACAUAUCUAUUAGAAAAU    |
| hsa-mir-4729    | AACUGUGACCUU              |
| hsa-mir-4732    | UGUGUGUGUCCA              |
| hsa-mir-4739    | UGUCUCC                   |
| hsa-mir-4768    | GGGAACUGUG                |
| hsa-mir-4776-2  | UGUCCUUUCA                |
| hsa-mir-4777    | ACCUCAUAUGU               |
| hsa-mir-4782    | AAAAGAUUUGGUGUU           |
| hsa-mir-4786    | UCUCCCUGUGA               |
| hsa-mir-4787    | ACGGCCUGU                 |
| hsa-mir-4802    | AGUGUUCAAGUCU             |
| hsa-mir-5087    | GUUAAGUGUUGUCCUAC         |
| hsa-mir-5091    | GCGGGUUGUGGGGUUUAGGU      |
| hsa-mir-5188    | UGUAAGCAGGAUCCAUUCA       |
| hsa-mir-5190    | UUAAUGUCCACAG             |
| hsa-mir-5581    | ACCCUAUACAUACCUGU         |
| hsa-mir-5588    | UUUUUUUUUUUUUUUUUUAAUGUUA |
| hsa-mir-4536-2  | AUGUAUAAAA                |
| hsa-mir-5590    | GUGUUGAUCAAC              |
| hsa-mir-5692a-1 | CCUCAUGUGU                |
| hsa-mir-5692a-2 | CCUCAUGUGU                |
| hsa-mir-5694    | CAUAUGUAUCUG              |
| hsa-mir-5696    | ACAAUGU                   |
| hsa-mir-5701-1  | CCUAAGACUUGU              |
| hsa-mir-5702    | UGAAAUCCUUCUGUA           |
| hsa-mir-5692b   | UGUGUACA                  |
| hsa-mir-5707    | UGUGAACA                  |
| hsa-mir-5701-2  | CCUAAGACUUGU              |
| hsa-mir-6068    | GCUGAGUGU                 |
| hsa-mir-6075    | AUGUCCAGU                 |
| hsa-mir-6077    | GCUAGUUUGUUUGU            |

|                |                         |
|----------------|-------------------------|
| hsa-mir-6080   | GGGCUGGUUGUC            |
| hsa-mir-6090   | GCGAUGU                 |
| hsa-mir-6124   | CAAUGUCCUG              |
| hsa-mir-6132   | UAUCCGCUGUUG            |
| hsa-mir-6134   | UGAUGUCAGUA             |
| hsa-mir-6165   | AUCCACCUGU              |
| hsa-mir-6499   | UGUUGGG                 |
| hsa-mir-6505   | UGUCUCUGG               |
| hsa-mir-892c   | ACUUAGAUUACAUGU         |
| hsa-mir-6732   | CCAUCAGUGUGGG           |
| hsa-mir-6733   | CCUUCUUGU               |
| hsa-mir-6749   | UGUCCUGUCUCACUCA        |
| hsa-mir-6781   | GCUUCUCCCAAUGU          |
| hsa-mir-6784   | GAGUCUGUC               |
| hsa-mir-6785   | CACUGUG                 |
| hsa-mir-6788   | AUUGAUUGU               |
| hsa-mir-6806   | UCCAUGUGA               |
| hsa-mir-6807   | GGGGAGAUGUGAAGGAAAGAACU |
| hsa-mir-6812   | AGUCCUGUCU              |
| hsa-mir-6816   | GGGACUGUGACA            |
| hsa-mir-6820   | CCUCAUGU                |
| hsa-mir-6823   | UGUGAAAG                |
| hsa-mir-6824   | CCUUCACUGU              |
| hsa-mir-6827   | UGUCUCUGAG              |
| hsa-mir-6830   | UCCCUCAUCUGUUUCUCACUGG  |
| hsa-mir-6833   | AAAAUCCCUGUUAACUU       |
| hsa-mir-6834   | CCUGUACUAGCCAUGG        |
| hsa-mir-6835   | AUGUUUGU                |
| hsa-mir-6841   | GUGUUUUUAAC             |
| hsa-mir-6859-1 | GCGGGUGUCAGC            |
| hsa-mir-6862-1 | GAUUUGUCUC              |
| hsa-mir-6864   | UGUGGGUCA               |
| hsa-mir-6874   | GCUUUAAUGU              |
| hsa-mir-6888   | UGUCUCUGAUUGUUCCAAG     |
| hsa-mir-6893   | CCCACUGUGG              |
| hsa-mir-3690-2 | AGGUGUUUCUACU           |

|                |                     |
|----------------|---------------------|
| hsa-mir-7155   | GUUGUGACAU          |
| hsa-mir-7852   | ACUACUACUUUCAUAUGU  |
| hsa-mir-7855   | ACUAUUGU            |
| hsa-mir-7856   | CCUUUGUUCUGG        |
| hsa-mir-8073   | CGUCAGUGUUUG        |
| hsa-mir-6862-2 | GAUUUGUCUC          |
| hsa-mir-6859-2 | GCGGGUGUCAGC        |
| hsa-mir-6859-3 | GCGGGUGUCAGC        |
| hsa-mir-1244-4 | ACUUAGCUGU          |
| hsa-mir-6859-4 | GCGGGUGUCAGC        |
| hsa-mir-5701-3 | CCUAAGACUUGU        |
| hsa-mir-10395  | UGACUGUGACCA        |
| hsa-mir-10527  | CUGUUUCCUCUUAUUCAAG |
| hsa-mir-11399  | UGUUUCCCCA          |
| hsa-mir-3085   | AUUAUGUGU           |
| hsa-mir-6529   | CAGUGUCA AUG        |
| hsa-mir-12129  | CCACAAAAUGUUACUAGGG |
| hsa-mir-12131  | ACUGAUGU            |

**Supplementary Table S3b.** miRNAs predicted to be recognized by DGCR8 (through UGU motif in the loop sequence) in one direction (5' → 3').

| miRNA name    | miRNA loop sequence (motif in red) |
|---------------|------------------------------------|
| hsa-mir-17    | UGAUAUGUGCA                        |
| hsa-mir-19b-1 | GCUGUGUGAUAUUCUGC                  |
| hsa-mir-23a   | UGC UCCUGUCACA                     |
| hsa-mir-26a-1 | CUGUGCAGGUCCCAAUGGG                |
| hsa-mir-26b   | UGUGCUGUCC                         |
| hsa-mir-224   | AUUGUGCAU                          |
| hsa-let-7i    | GUUGUGACAUUGC                      |
| hsa-mir-134   | AUGCACUGU                          |
| hsa-mir-296   | UGUGCCUAAUUCA                      |
| hsa-mir-135b  | UGCUGUCCCA                         |
| hsa-mir-346   | CUGUUGCUCUGAAG                     |
| hsa-mir-500a  | GCUGUCUGAAUGC                      |
| hsa-mir-487b  | CGUUUUGCUC AUGUCG                  |
| hsa-mir-572   | GCGCCUGUGC                         |



|                 |                                     |
|-----------------|-------------------------------------|
| hsa-mir-606     | UGUGCCA <u>UCCA</u>                 |
| hsa-mir-623     | GCUG <u>UGC</u>                     |
| hsa-mir-758     | GCUUUAAUU <u>UGUGC</u>              |
| hsa-mir-1301    | <u>CUGUGC</u> UGGGG                 |
| hsa-mir-769     | GAUGU <u>UGC</u> UCUC               |
| hsa-mir-802     | GUGUCCAUCA <u>UGCAAC</u>            |
| hsa-mir-301b    | <u>CUGUGC</u> UCUGAGAAG             |
| hsa-mir-1179    | <u>UGUAU</u> UGCCU                  |
| hsa-mir-1307    | <u>UGUGU</u> UGCCA                  |
| hsa-mir-1910    | U <u>UGUGC</u> GUCCUUGGA            |
| hsa-mir-3659    | <u>UGC</u> U <u>GU</u> AUA          |
| hsa-mir-3678    | GUU <u>UGU</u> UGC                  |
| hsa-mir-4420    | <u>UGUGC</u> ACA                    |
| hsa-mir-4425    | GCUU <u>UGC</u> GAAG <u>UGU</u>     |
| hsa-mir-4442    | G <u>UGUG</u> UG <u>UGC</u>         |
| hsa-mir-4452    | GUAG <u>UGGC</u> AC                 |
| hsa-mir-3689d-1 | <u>UGUGC</u> UAUCG                  |
| hsa-mir-3689d-2 | <u>UGUGC</u> UAUCG                  |
| hsa-mir-3689f   | <u>UGUGA</u> UGCUGUG                |
| hsa-mir-4499    | GU <u>UGU</u> ACAUAAGAAA <u>UGC</u> |
| hsa-mir-4539    | GC <u>UGUGC</u>                     |
| hsa-mir-4749    | <u>UGUGC</u> ACA                    |
| hsa-mir-5000    | GUAACU <u>UGUGC</u> UUAUAAC         |
| hsa-mir-5587    | GCCC <u>UGUGC</u>                   |
| hsa-mir-5591    | GCUUA <u>UGUA</u> UGC               |
| hsa-mir-6728    | AC <u>UGCCC</u> UGU                 |
| hsa-mir-6737    | GGUU <u>UGU</u> UGCUUAUUC           |
| hsa-mir-6746    | GAGC <u>UGC</u> UGUC                |
| hsa-mir-6761    | G <u>UGU</u> UGC                    |
| hsa-mir-6797    | <u>CUGUGC</u> UCACUGGG              |
| hsa-mir-6848    | GG <u>UGUGC</u> UCUGAUCCCCU         |
| hsa-mir-7850    | <u>CUGUGC</u> AG                    |
| hsa-mir-7851    | <u>UGUGC</u> CACCA                  |

**Supplementary Table S3c.** miRNAs predicted to be recognized by both MCP1P1 and DGCR8 proteins (through UGC and UGU, respectively, in the loop sequence) in one direction (5' → 3') with overlap option.

### 3 Common motifs in pre-miRNAs interacting with DDX1

| Motif sequence | <i>p</i> |
|----------------|----------|
| CUAAAYACU      | 1.7e-007 |
| CGYUUU         | 5.5e-007 |
| CUGKUAA        | 1.4e-006 |
| CRUCUUAC       | 1.4e-006 |
| AAUCRU         | 1.1e-005 |

**Supplementary Table S4.** Motifs predicted to be recognized by DDX1 within whole pre-miRNA sequence against all human pre-miRNA sequences in one direction (5' → 3').

| miRNA name     | miRNA precursor sequence (motif in red)                                                                               | Included in initial experimental group |
|----------------|-----------------------------------------------------------------------------------------------------------------------|----------------------------------------|
| hsa-mir-141    | CGGCCGGCCCUGGGUCCAUCUCCAGUACAGUG<br>UUGGAUGGUCUAAUUGUGAAGCUCCUAACACUG<br>UCUGGUAAAGAUGGCUCCCGGGUGGGUUC                | Yes                                    |
| hsa-mir-429    | CGCCGGCCGAUGGGCGUCUACCAGACAUGGUU<br>AGACCUGGCCUCUGUCUAAUACUGUCUGGUAA<br>AACCGUCCAUCCGCUGC                             | Yes                                    |
| hsa-mir-548b   | CAGACUAUAUAUUUAGGUUGGCGCAAAGUAA<br>UUGUGUUUUGGCCUUUAUUUCAAUGGCAAG<br>AACCUCAGUUGCUIUUGUGCCAACCUAAUACUU                | No                                     |
| hsa-mir-548h-4 | GCUAAUAGGUUGGUGCAAAGUAAUCGCGGUU<br>UUUGUCAUUACUUAAUACUUUACGUUUCU<br>UAAUGACAAAACCGCAAUACUUUUGCACCAA<br>CCUAAUACUUGCUA | No                                     |
| hsa-mir-200b   | CCAGCUCGGGCAGCCGUGGCCAUCUACUGGGC<br>AGCAUUGGAUGGAGUCAGGUCUCUAAUACUGCC<br>UGGUAAUGAUGACGGCGGAGCCCUGCACG                | Yes                                    |
| hsa-mir-200c   | CCCUCGUCUACCCAGCAGUGUUUGGGUGCGGU<br>UGGGAGUCUCUAAUACUGCCGGGUAUGAUGG<br>AGG                                            | Yes                                    |
| hsa-mir-200a   | CCGGGCCCCUGUGAGCAUCUACCGGACAGUGC<br>UGGAUUUCCCAGCUUGACUCUAAACACUGUCUGG<br>UAACGAUGUCAAAGGUGACCCGC                     | Yes                                    |

**Supplementary Table S5.** miRNA precursors predicted to be recognized by DDX1 with most significantly enriched motif (CUAAAYACU) in one direction (5' → 3').
